# Supplementary material for: Sensitization of Radioresistant Prostate Cancer Cells by Resveratrol Isolated from Arachis hypogaea Stems
Source: PubMed Central journal article supplement (PMC5231355; doi:10.1371/journal.pone.0169204), 2017-01-12

**A**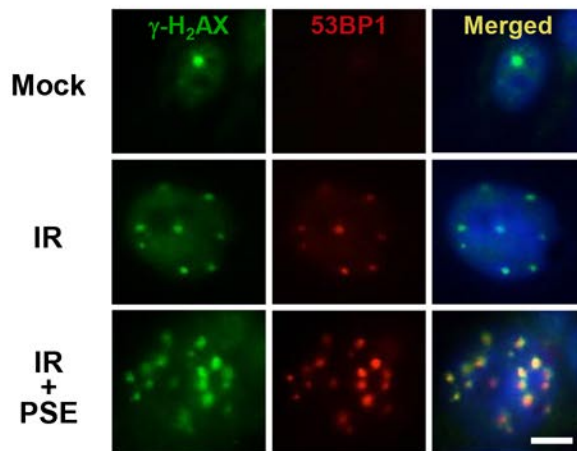**B**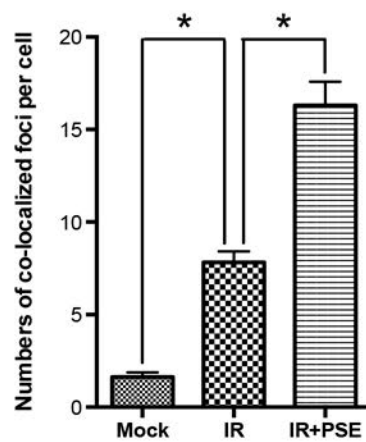

Supplement: pone.0169204.s002.pdf [file pone.0169204.s002.pdf]
